# Supplementary material for: Clinical Characteristics and In Vitro Analysis of MYO6 Variants Causing Late-onset Progressive Hearing Loss
Source: MDPI journal article supplement (doi:10.3390/genes11030273), 2020-03-04
Supplement: s1 [file s1]

|                     |                                    |
|---------------------|------------------------------------|
| Mutagenesis primers |                                    |
| MY06 c.374C-A F1    | AGACCACATCATGTCCTTTCGAATTGCTGA     |
| MY06 c.374C-A R1    | ACATGATGTGCTCTGTCCCCAGAGA          |
| MY06 c.604A-G F1    | GCAACAATGATGACGCTGATTTGGGAATTTG    |
| MY06 c.604A-G R1    | TGCTATCATTTGGGGAACAGCTCTCG         |
| MY06 c.614G-A F1    | TAGCAGTCATTGGGAAATTGTAGAAATACAT    |
| MY06 c.614G-A R1    | CCAAATTGACTGCTATTATTGTGGCAACAGT    |
| MY06 c.647A-T F1    | TTTTAATGTAAGAAGCTCAGTTGTTGG        |
| MY06 c.647A-T R1    | CTCTTACATTAATAATGATTATTCTACAAATT   |
| MY06 c.1367G-A R1   | TCAAAATCAGCAATATCTAGGACTCCAAATAA   |
| MY06 c.1376G-A F1   | TATTGCTGATTTTGAGTACTTTGAGCATAACAGT |
| MY06 c.1455T-A F1   | TTTTTAAAGAAGGATTCTGAAGGAGGA        |
| MY06 c.1455T-A R1   | CCTTCTTTAAAAAATTGTTGAAGTTTTCA      |
| MY06 c.2111G-A F1   | GCAGGGGTATTACCATCAGAGCTTCATTTC     |
| MY06 c.2111G-A R1   | GGGTAATCACCCGTCATCAAGTCAAAACAG     |
| MY06 c.2438G-C F1   | AAATATCCAGCTGAGGCTGCGATTAA         |
| MY06 c.2438G-C R1   | TCAGTGGATATTTTATTGTTTTCAAATT       |
| MY06 c.3746T-C F1   | AAGACAGTCTGAAGAATCTGGGAAGCTGTG     |
| MY06 c.3746T-C R1   | TCTCAGACTGTCTTGGCAAGATCTCAGC       |
| Sequencing primers  |                                    |
| MY06 Seq Primer R2  | GGTTGTGCTGGGTTTCATT                |
| My06 Seq Primer R3  | CGGCGGGGCCCTCATCACTGATGA           |
| My06 Seq Primer R4  | CTGGATTGTCTCTGCTGCATCAT            |
| My06 Seq Primer R5  | GGTTAACCCAAACTGTAGTCATTTC          |
| My06 Seq Primer R6  | GATTCAGAGACATATGTAAAGCATCAT        |
| My06 Seq Primer R7  | GTTCAAACTGTTATGCTCAAAGTACTC        |
| My06 Seq Primer R8  | GCACATCTAATAAATCACCATGGTC          |
| My06 Seq Primer R9  | CCATAGGATTGATGAGGTATCTTAG          |
| MY06 Seq Primer F2  | GCTTTCSAGACATGAAGGTGC              |
| MY06 Seq Primer F3  | GTATTTAAACCGAGGCTGCACTAG           |
| MY06 Seq Primer F4  | GTGAGCAAGCAACAATGCTC               |
| MY06 Seq Primer F5  | CACAAGGATCATTTTGACTCACT            |
| MY06 Seq Primer F6  | GATGACAAGCCACACTTG                 |
| MY06 Seq Primer F7  | GAATGTGGCTTTGCAAGAGAGAC            |
| MY06 Seq Primer F8  | GCATCAAGCTGAAGTGGAGGCACAG          |
| MY06 Seq Primer F9  | GAATACTGAACAGAGCAACGTCCTC          |
| Halotag pFN2 1A F1  | GCCATTAGCCATATTATCATGTGTT          |
| Halotag pFN2 1A F2  | GCCCCCTATTGAGGTCATGAC              |
| Halotag pFN2 1A F3  | ATCTAGAGAAGCTTATTGCGGTAG           |
| Halotag pFN2 1A F4  | GACCCCCATTATGTGGAGTC               |
| Halotag pFN2 1A F5  | GAGTTTCATCCGCCCTATCCGA             |
| Halotag pFN2 1A F6  | GCCAAAGCCTGCTAAGTCA                |
| Halotag pFN2 1A F7  | CACAAGTGAATGACGTCAGTGAATAAAT       |
| Halotag pFN2 1A F8  | CAATATGTATCCGCTCATGAGACAATA        |
| Halotag pFN2 1A F9  | GCATCTACGGATGGCATGA                |
| Halotag pFN2 1A F10 | GCAGCACTGGGGCCAGATGG               |
| Halotag pFN2 1A F11 | GAAGCTCCTCGTGCSET                  |
| Halotag pFN2 1A F12 | GCTCTGATCGGCAACAACACC              |
| Halotag pFN2 1A F13 | CAGTTTTTCGGGTGTTGTTGCC             |
| Halotag pFN2 1A R1  | GATCTGATCCTCTACGCCGG               |
| Halotag pFN2 1A R2  | CGTGAGTTTTGTTCCACTGAGC             |
| Halotag pFN2 1A R3  | CAGCTTGGAGCGAAGACCTAC              |
| Halotag pFN2 1A R4  | CTTAATCAGTGAAGGACCTATCTC           |
| Halotag pFN2 1A R5  | GTTGTGCAAAAAGCGGTTAGC              |
| Halotag pFN2 1A R6  | GCAAAATGCCCAAAAAGGGA               |
| Halotag pFN2 1A R7  | GTTGTTTAACTGTTATTATGAGC            |
| Halotag pFN2 1A R8  | GGCATCTCGTGGCGATCAGGT              |
| Halotag pFN2 1A R9  | GATCAGCTGCGGCCGAGCTCG              |
| Halotag pFN2 1A R10 | GTCGGGTTACGTCGAGGAAC               |
| Halotag pFN2 1A R11 | GCACGACTGCGTTAGCAATTA              |
| Halotag pFN2 1A R12 | GCATATGATACACTGTGATGACTGCC         |
