# Supplementary figures and images for: Clinical Characteristics and In Vitro Analysis of MYO6 Variants Causing Late-onset Progressive Hearing Loss
Source: MDPI journal article supplement (doi:10.3390/genes11030273), 2020-03-04

A.

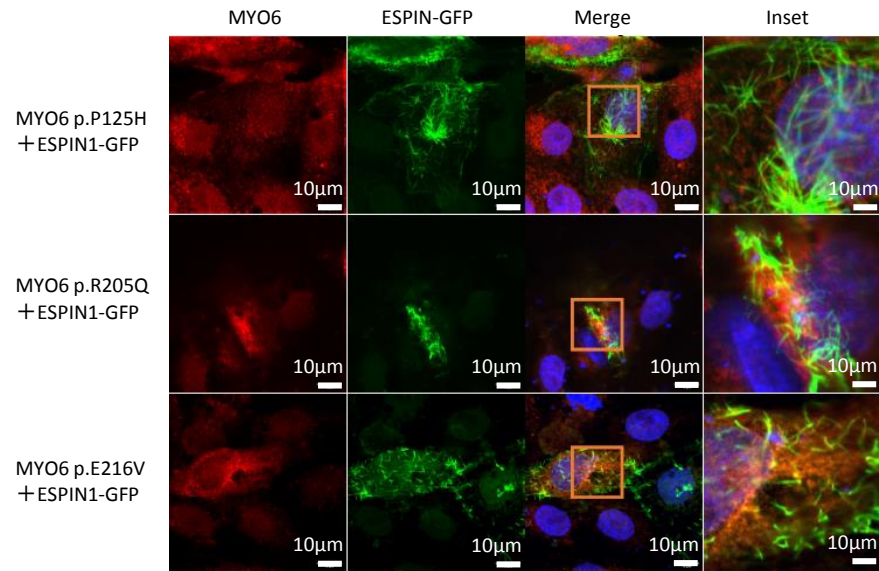

B.

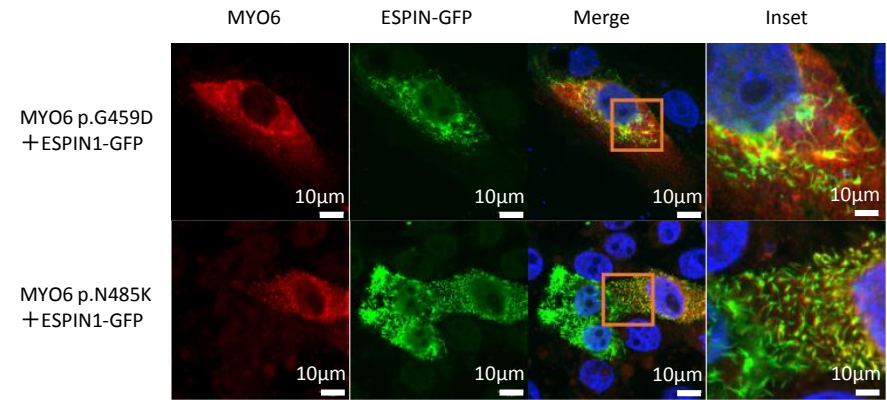

C.

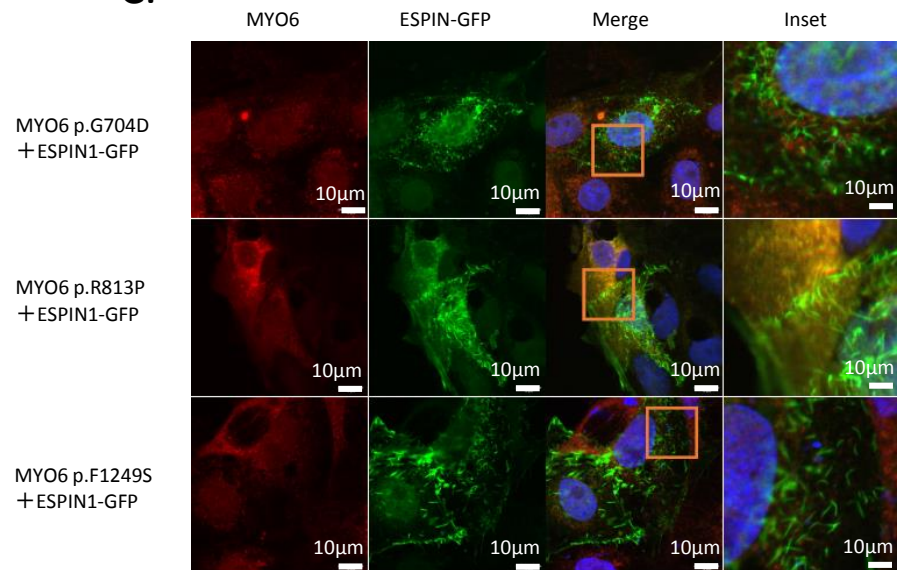

Supplement: s1 [file s1]
